# Supplementary material for: Evaluation of the atmosphere-land-ocean-sea ice interface processes in the Regional Arctic System Model Version 1 (RASM1) using local and globally gridded observations
Source: Copernicus journal article supplement (doi:10.5194/gmd-2018-104), 2018-06-18
Supplement: Supplementary file [file gmd-2018-104-AC1-supplement.pdf]

## Reply to Referee 1's comments

The referee comments are in **Arial**. The authors' responses are given following each comment in *Times New Roman Italic*.

*We thank the referee for your helpful comments. We recognize that such an exhaustive model evaluation as this can be very tedious. We feel that that cannot be helped, but we now highlight the unique results (i.e., the diurnal cycle evaluation and the differentiation of RASM1 from global climate and Earth system models like CESM by capturing the actual interannual variability) in the abstract to possibly make it more interesting for a general reader to tread through the other results. We have addressed all of your other comments as well below.*

Overall, I think the content of the paper is fine. I have a few minor suggestions for improving some of the details. My major quibble with the paper is the presentation: most of the paper is a recitation of similarities and differences among various simulations and data sets, which could be useful in and of itself to other users of the RASM model, but the paper was quite uninteresting to me until I read the Conclusions section where, finally, there was some indication of what scientific interest the paper might hold. I would prefer to see these things laid out earlier and/or more explicitly, as the take-home points, e.g. in the abstract.

*Response: This has been addressed in response to the suggestions to add to the abstract made below.*

For example, this paper compares not only RASM1, but also several different reanalysis data sets (which are also model output) to observed data. The results of the reanalysis-data comparison are interesting. Have other authors already made these comparisons? If so, cite them, e.g. in the first paragraph of section 3.2.

*Response: A number of studies have evaluated reanalyses by comparing them to in-situ surface observations, but that is not the emphasis of this paper. We add to Line 4 on page 13: "Reanalyses have been evaluated previously through comparisons to surface in-situ observations (e.g., Decker et al., 2012; Betts et al., 2006; Zhou and Wang, 2016; Du et al., 2018), but this is not the focus here. Instead, we assess whether or not the reanalysis spread is within the observational spread."*

The insight gained from looking at diurnal cycles is another interesting aspect of the paper. It is mentioned in the abstract, but what is interesting about it is not there, only that it is related to the biases. Explaining a bit more would make the paper more compelling, so readers might actually plow through the recitation of similarities and differences.

*Response: We add to the abstract at Line 28: "At some locations, a minimal monthly mean bias is shown to be due to the compensation of roughly equal but opposite biases between day- and nighttime, whereas this is not the case at locations where the monthly mean bias is higher in magnitude. The diurnal cycle biases are derived from errors in the diurnal cycle of the energy balance (radiative and turbulent flux) components. Therefore, the key to advancing the simulation of SAT and the surface energy budget would be to improve the representation of the diurnal cycle of radiative and turbulent fluxes."*

I would like to see this in the abstract and/or introduction: What did you learn from this exercise that is new and applicable more generally than just this RASM model? Please make any new physical insights into the system the centerpiece of the paper, rather than just saying that it's a comparison of RASM with data and some other models.

*Response: This has been addressed in the response to the above comment and the one below about mentioning the advantage of using RASMI in the abstract.*

More specific comments:

Abstract: In my opinion, statements like “The possible reasons for this result are discussed” are wasted words. Why not put a summary of the reasons themselves in the abstract?

*Response: This sentence is deleted.*

page 2 line 28: is a paper published in 2011 really suitable support for a claim that something “cannot be represented within the computational constraints of the current generation of ESMs”?

*Response: We change this to “that may be better represented by a regional coupled model.”*

In the first sentence of section 3, land biases are blamed on Arctic Ocean (sea ice?) biases. Do you know that it goes that direction? Why wouldn't the biases in/over the ocean be attributable to land biases?

*Response: We change this sentence to “Some of the model land biases are similar to biases over the neighboring central Arctic Ocean.”*

page 16 lines 28-29: why was a new baseline run done? Is this why? If so, was it worth it?

*Response: The current baseline simulation incorporating different boundary layer and convection parameterizations (MYNN and KF, respectively, vs. YSU and Grell-Dévényi before) was developed to alleviate cold SST biases that it had in the subpolar North Pacific from there being too little or too optically thin clouds over that region. The use of different parameterizations was motivated from the findings of Jousse et al. (2016), and they did alleviate the SST biases there (see Cassano et al., 2017). We now mention the previously used parameterizations in that sentence and add this next sentence: “The switch to MYNN and KF as is used in the current baseline was shown by Jousse et al. (2016) to produce a more realistic boundary layer height, liquid water path, and downward shortwave radiation in stratocumulus typical of the sub-polar oceans where the previous baseline produced a large cold SST bias.”*

page 17 line 18: why might WRF 3.2 improve the situation?

*Response: We change “WRF3.2” to “the latest version of WRF”, because WRF3.2 is what is currently used in RASMI now. It currently does not include the radiative impact of convective clouds. RASM2 will include a newer version which does consider this important effect. We further add, “as it will include at least the radiation changes mentioned above.”*

page 17 lines 26 and following (the last paragraph of the paper) should be mentioned in the abstract.

*Response: We mention this now as the last sentence in the abstract: “Still, an advantage of RASMI is that it captures the interannual and interdecadal variability in the climate of the Arctic region of which global models like CESM cannot do.”*

The paper is pretty sloppy. For instance,

English grammar and spelling is quite poor in this manuscript. E.g. lines 3 and 4 on page 2: “Sea ice thickness also decreased along with the sea ice extent decline . . . decreases . . .”

*Response: We correct this and all other typos.*

Acronyms are not defined, or are defined long after they are first used. E.g. GCM, ESM, SAT.

*Response: We define these at their first instance now.*

Figure numbers are wrong, e.g. page 9 line 12 should refer to fig 2, not 3; line 11 of page 16 should refer to fig 15, not 14; fig 6 in the fig 5 caption should be fig 4 (I think)

*Response: We correct these.*

Fig 10 and 14 captions refer to a purple trace as RASM1a, which is not shown.

*Response: We remove these.*

Why is there a break in the plotted data of panel a in fig. 13?

*Response: We add to the figure caption: “No LH flux measurements are available in February 1998.”*
